# Supplementary figures and images for: Development and evaluation of a Japanese prediction model for low anterior resection syndrome after rectal cancer surgery
Source: Research Square preprint supplement (doi:10.21203/rs.3.rs-109435/v1), 2020-12-03

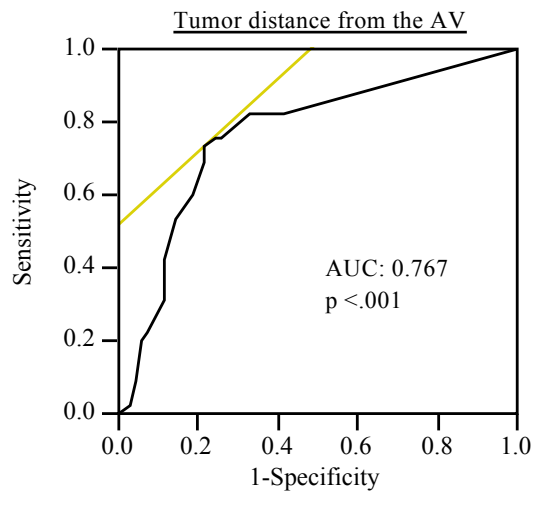

Cut-off: 8.5  
Sensitivity: 0.733  
Specificity: 0.786

Supplement: Supplementary file 1 [file 65623fed9b0c0da0ed45d26a.pdf]
